# Supplementary material for: A far red emissive RNA aptamer–fluorophore system for demethylase FTO detection: design and optimization
Source: Royal Society of Chemistry journal article supplement (doi:10.1039/d3nj00043e), 2023-01-01
Supplement: d3nj00043e1.pdf [file d3nj00043e1.pdf]

## Supplementary information

### **A Far Red Emissive RNA Aptamer-Fluorophore System for Demethylase FTO Detection: Design and Optimization**

Wenjuan Gao, Liren Xu, Jing Jing\*, Xiaoling Zhang\*

Key Laboratory of Medical Molecule Science and Pharmaceutics Engineering,  
Ministry of Industry and Information Technology, Key Laboratory of Cluster Science  
of Ministry of Education, Beijing Key Laboratory of Photo-electronic/Electro photonic  
Conversion Materials, Analytical and Testing Center, School of Chemistry and  
Chemical Engineering, Beijing Institute of Technology, Beijing 100081, P. R. China.  
School of Medical Technology, Beijing Institute of Technology, Beijing, 100081, PR  
China.

*E-mail address:* hellojane@bit.edu.cn (J. Jing), zhangxl@bit.edu.cn (X.L. Zhang)

## Supplementary Fig. S1

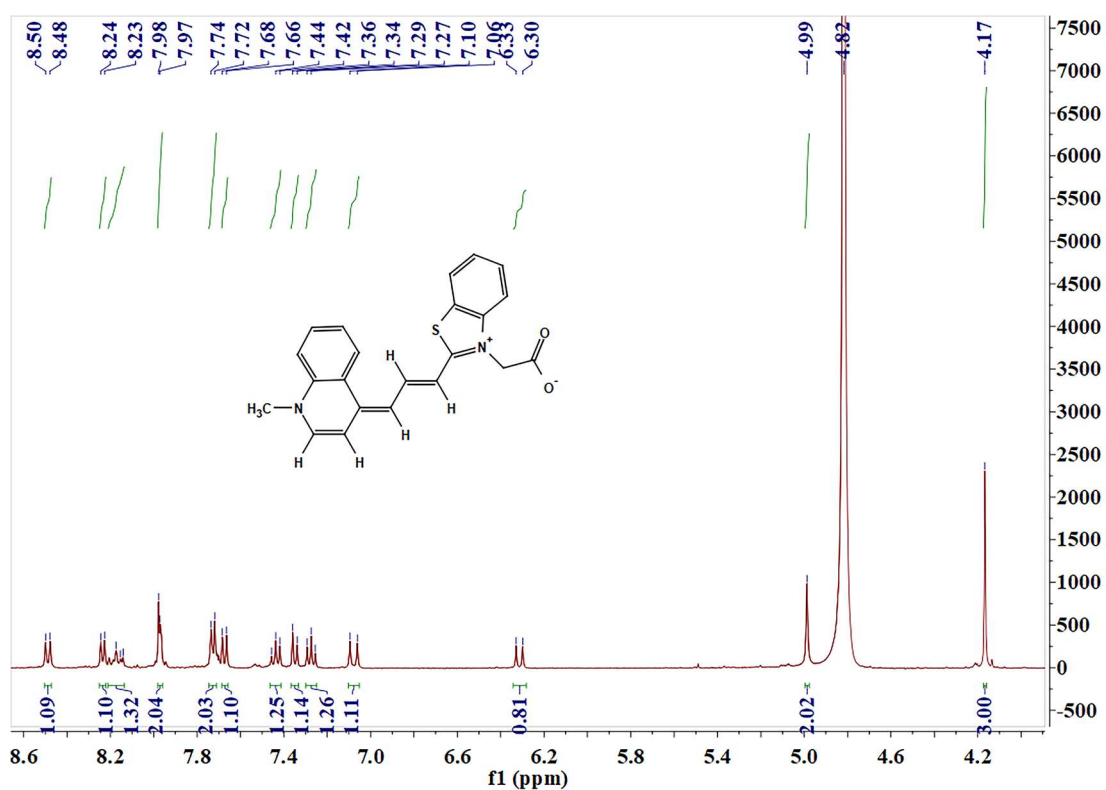

Fig. S1. <sup>1</sup>H NMR spectrum of TO3-Acetate in MeOD.

## Supplementary Fig. S2

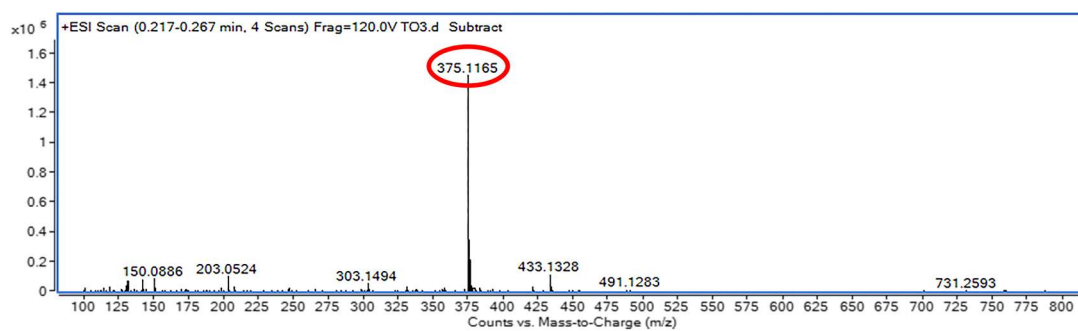

Fig. S2. ESI-MS spectrum of TO3-Acetate.

Supplementary Fig. S3

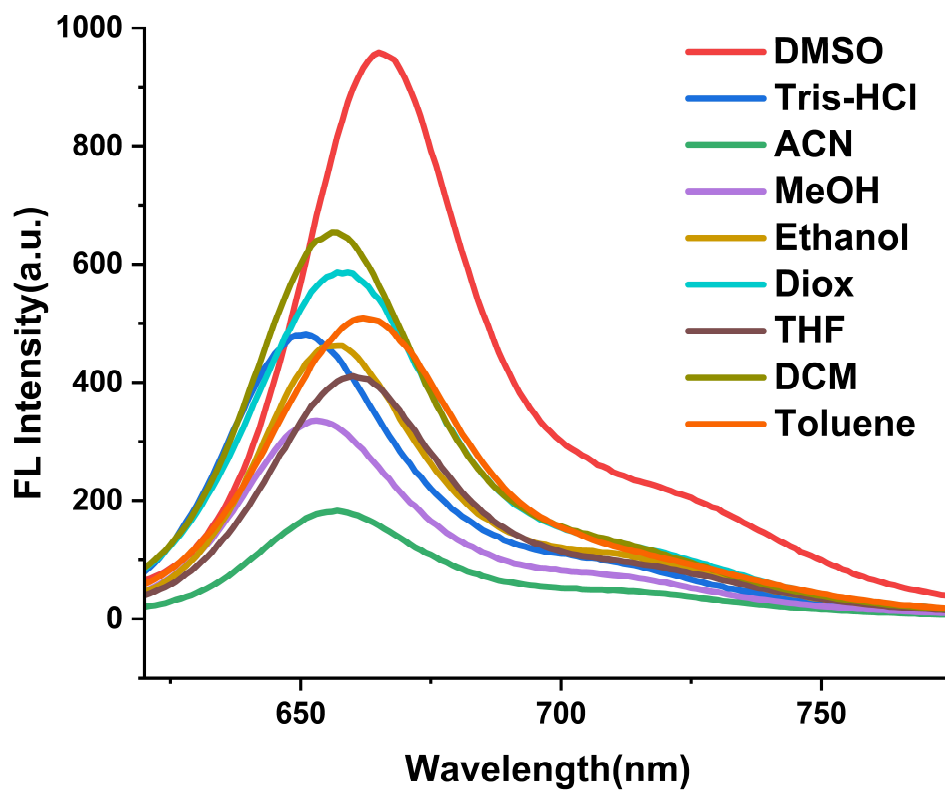

Fig. S3. Fluorescence spectra of TO3-Acetate (5 μM) in different solvents.  $\lambda_{ex/em}=600/650\text{nm}$ .

Supplementary Fig. S4

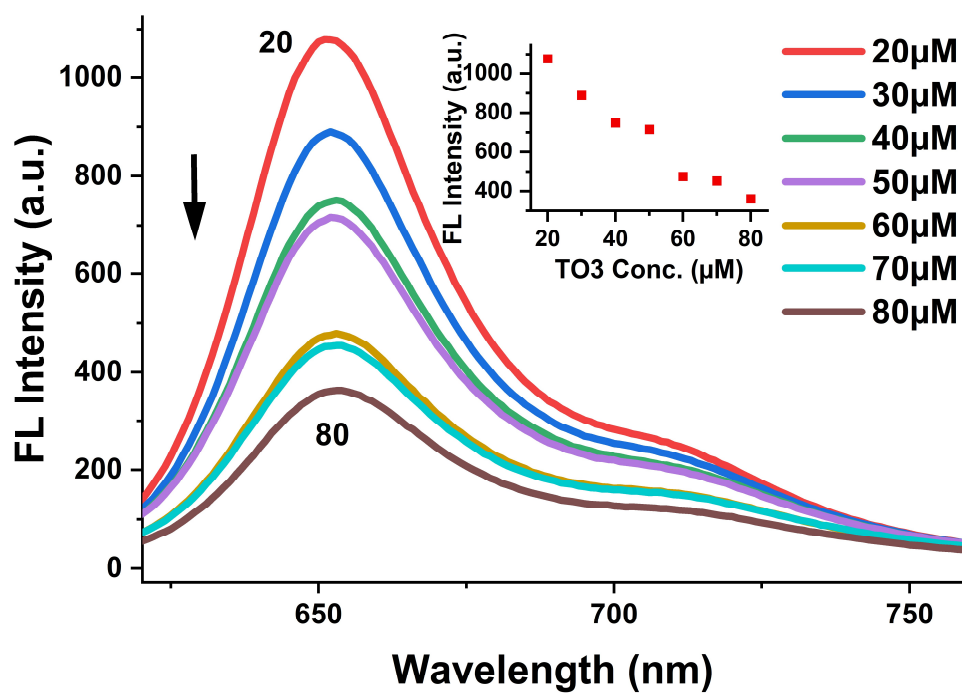

Fig. S4 The increasing TO3-Acetate results in changes to the fluorescence spectra. The inset displays the tendency for fluorescence intensity to vary when TO3-Acetate concentrations are varied from 20 to 80  $\mu\text{M}$  at 650 nm.



Supplementary Fig. S5

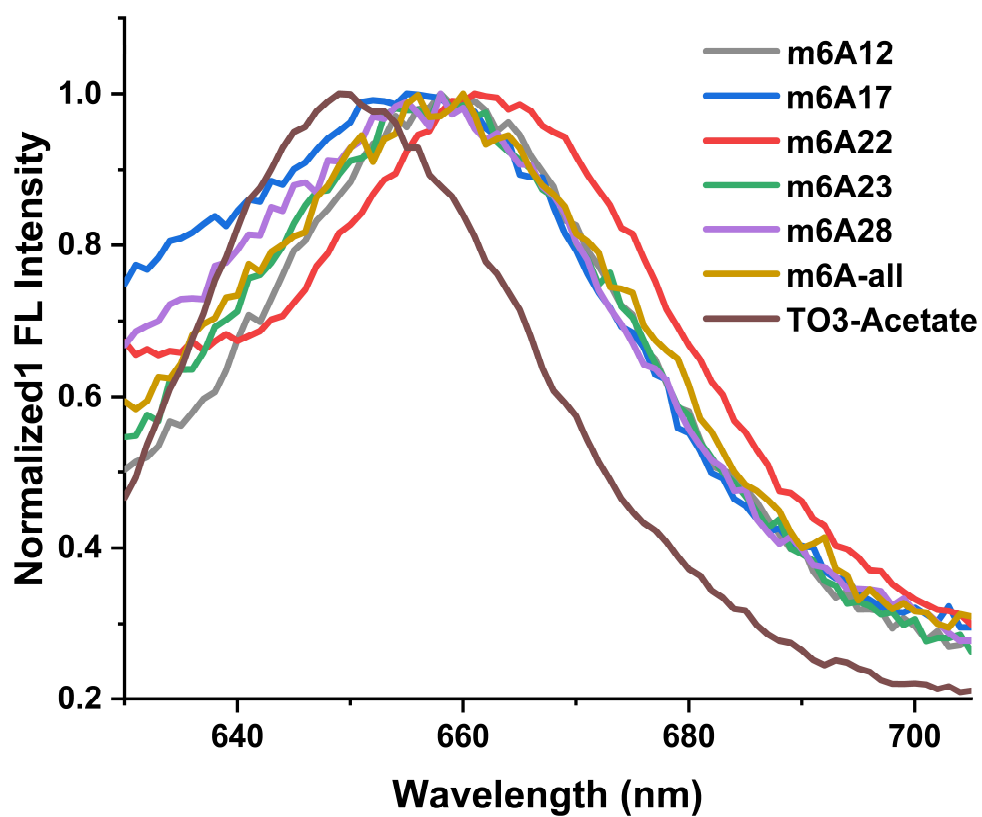

Fig. S5 Normalized Mango-m6A-TO3 fluorescence spectra.

Supplementary Fig. S6

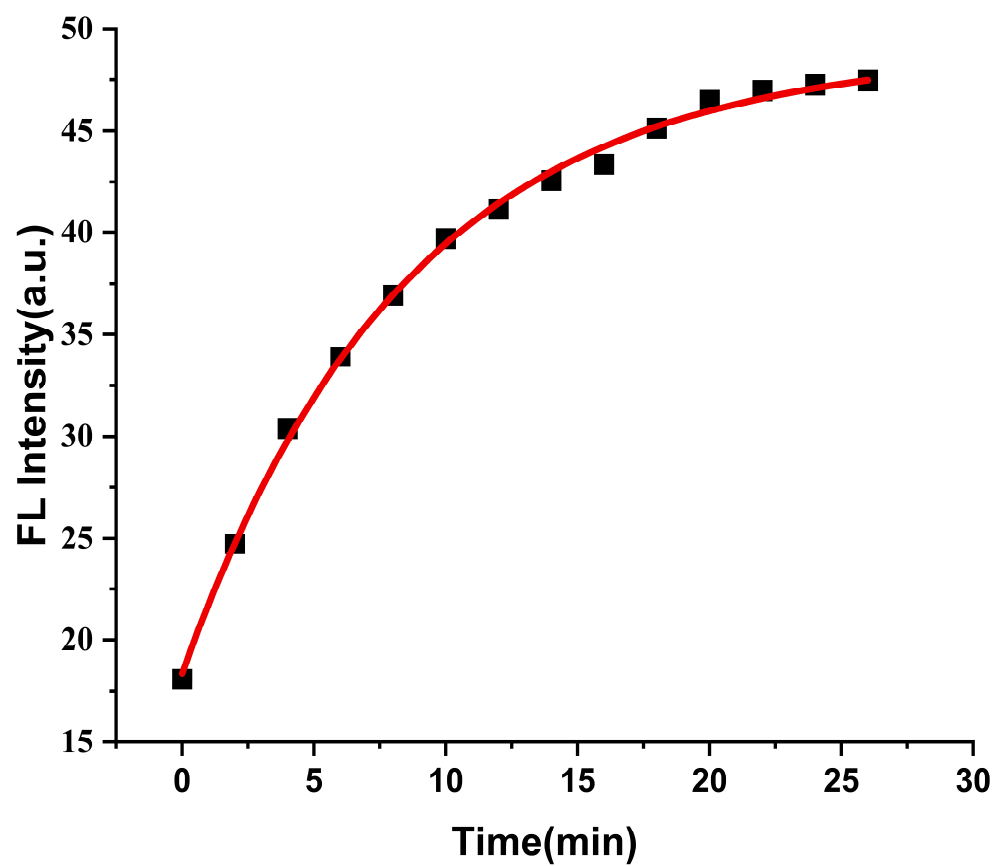

Fig. S6: Real-time fluorescence intensity monitoring of TO3-Acetate and Mango-m6A22 reaction. Experimental conditions: 50 nM TO3-Acetate, 50 nM Mango-m6A22.  $\lambda_{ex/em}=600/660\text{nm}$ .

Supplementary Fig. S7

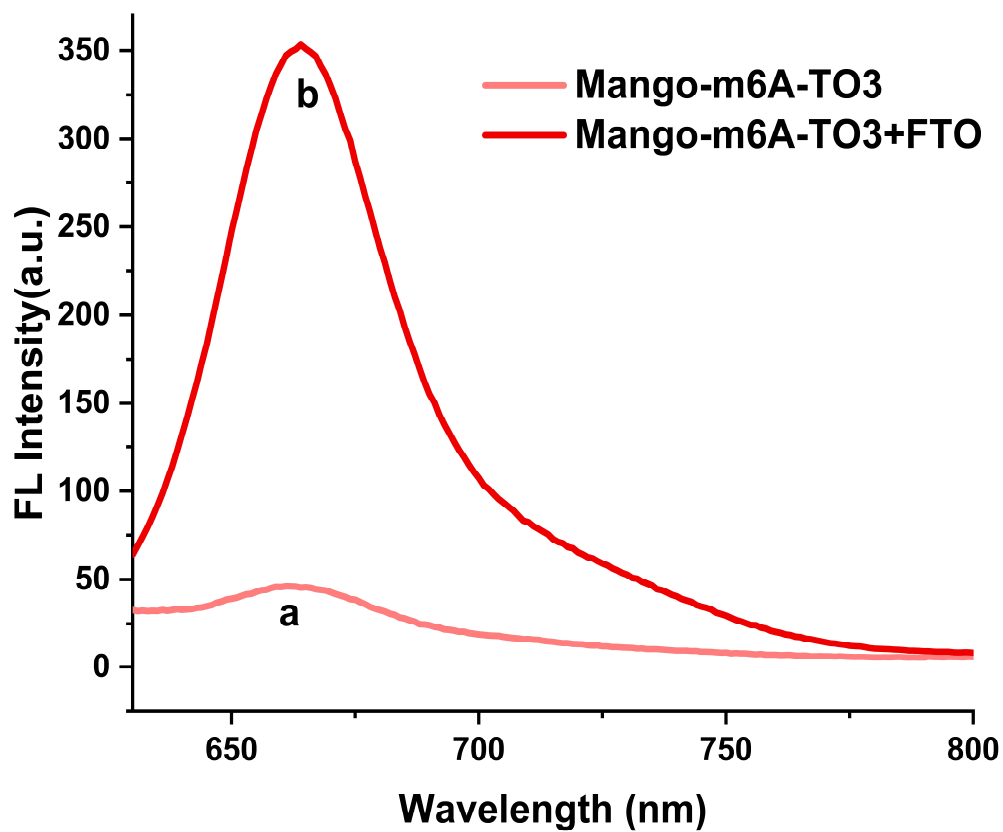

Fig. S7. Fluorescence responses of the system (Mango-m6A22-TO3) under different conditions: (a) Mango-m6A22-TO3; (b) Mango-m6A22-TO3+FTO; Experimental conditions: 50 nM Mango-m6A22-TO3, 250 nM FTO.  $\lambda_{ex}/em=600/660$ nm.
